# Supplementary material
Source: PubMed Central journal article supplement (PMC3702662)
Supplement: NIHMS478883-supplement-1.pdf [file NIHMS478883-supplement-1.pdf]

## Supplemental Table I

### Cytokine/Chemokine Levels in BAL Fluid

|                                | WT #1 | WT #2 | WT #3 | KO #1 | KO #2 | KO #3 |
|--------------------------------|-------|-------|-------|-------|-------|-------|
| <b>IL-1<math>\beta</math></b>  | ND    | ND    | ND    | ND    | ND    | ND    |
| <b>IL-6</b>                    | ND    | ND    | ND    | ND    | ND    | ND    |
| <b>IL-10</b>                   | ND    | ND    | ND    | ND    | ND    | ND    |
| <b>IL-12</b>                   | ND    | ND    | ND    | ND    | ND    | ND    |
| <b>IL-17A</b>                  | ND    | ND    | ND    | ND    | ND    | ND    |
| <b>G-CSF</b>                   | ND    | ND    | ND    | ND    | ND    | ND    |
| <b>TNF<math>\alpha</math></b>  | ND    | +     | ND    | ND    | ND    | ND    |
| <b>KC</b>                      | ND    | +     | ND    | ND    | ND    | +/-   |
| <b>MCP1</b>                    | ND    | ND    | ND    | ND    | ND    | +/-   |
| <b>MIP1<math>\alpha</math></b> | ND    | +/-   | ND    | ND    | ND    | +/-   |
| <b>MIP1<math>\beta</math></b>  | ND    | +/-   | ND    | ND    | ND    | +/-   |
| <b>RANTES</b>                  | ND    | ND    | ND    | ND    | ND    | +/-   |
| <b>SDF-1</b>                   | ND    | ND    | ND    | ND    | ND    | ND    |

Results of individual DBP<sup>+/+</sup> wild-type (WT) and DBP<sup>-/-</sup> knock-out (KO) mice are presented for each cytokine/chemokine tested. The BAL fluid was obtained 4 hours after 1  $\mu$ g purified mouse C5a was instilled into the lungs. The total protein concentration of all BAL fluid was normalized to 0.53 mg/ml. Cytokine/chemokine levels are presented as + (greater than 2x background), +/- at the lowest limit of detection, or not detected (ND).

# Supplemental Figure 1

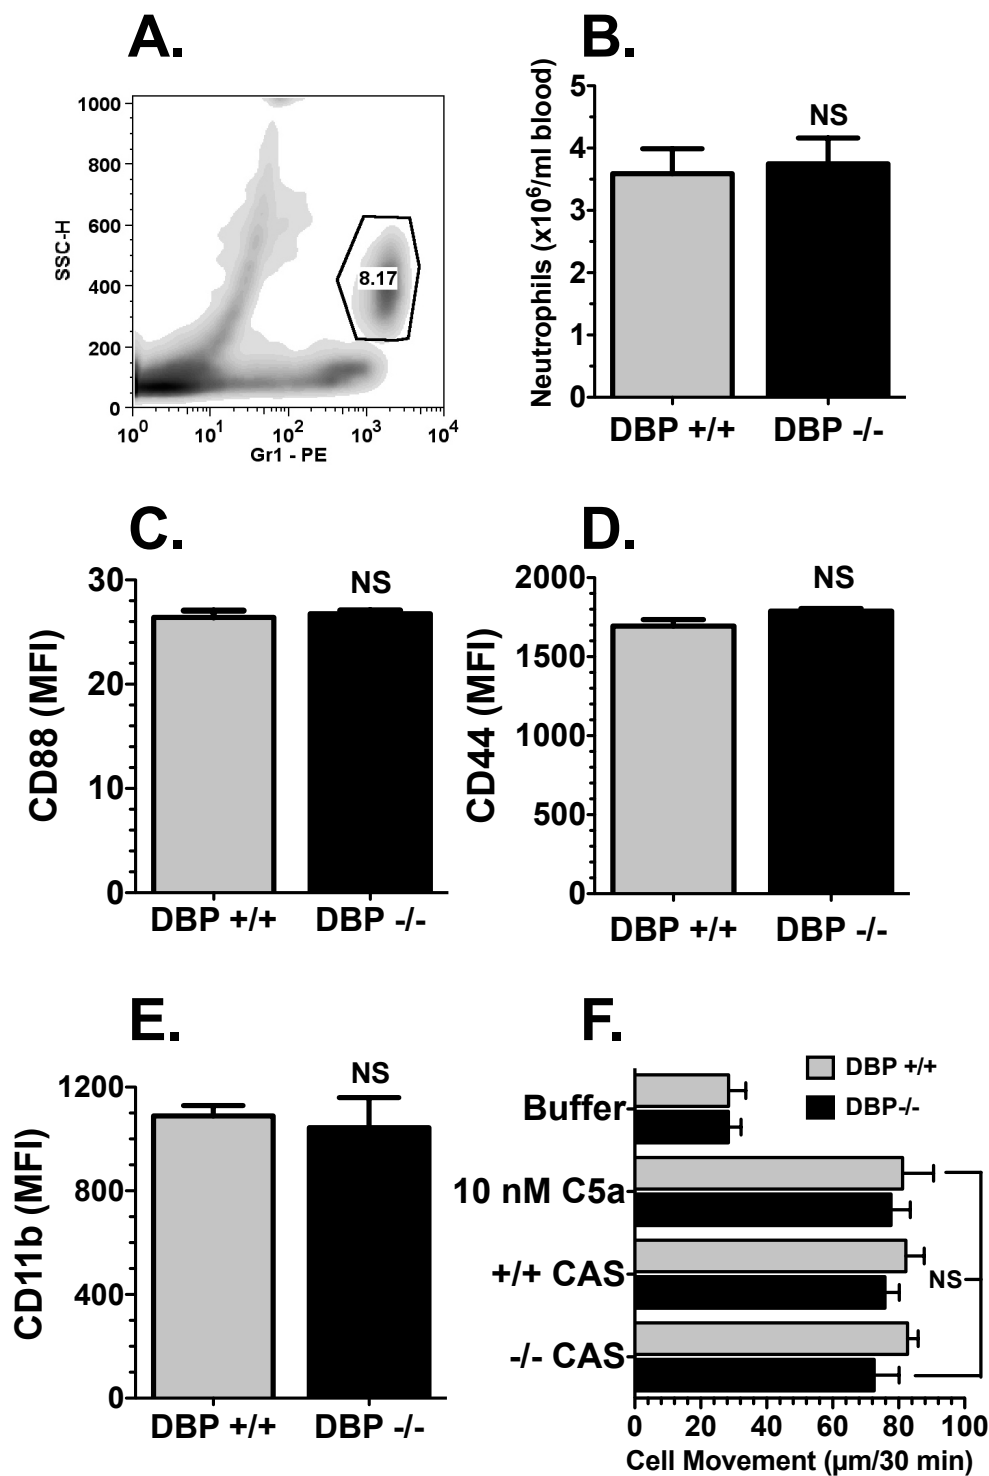

**Supplemental Figure.** Comparison of the total number and receptor expression of neutrophils in the blood of DBP<sup>+/+</sup> and DBP<sup>-/-</sup> mice. **(A)** Gating of Gr-1 high, side scatter (SSc) high neutrophil population in blood. **(B)** The number of total circulating neutrophils. **(C)** Mean fluorescence intensity (MFI) of neutrophil surface expression of the C5a receptor CD88. **(D)** Mean fluorescence intensity of neutrophil surface expression of the DBP binding site CD44. **(E)** Mean fluorescence intensity of neutrophil surface expression of the adhesion integrin CD11b. All flow cytometry experiments were n = 5. **(F)** In vitro chemotactic response (n = 3) of bone marrow-derived neutrophils to purified mouse C5a or 2% C-activated mouse serum (CAS). Numbers represent mean ± SEM, all results were not significant (NS).
